# Supplementary material for: DFT insights into Nb-based 211 MAX phase carbides: Nb2AC (A = Ga, Ge, Tl, Zn, P, In, and Cd)
Source: Royal Society of Chemistry journal article supplement (doi:10.1039/d2ra07468k), 2023-01-01
Supplement: d2ra07468k1.pdf [file d2ra07468k1.pdf]

## Supplementary Information File

### DFT insights into Nb-based 211 MAX phase carbides:

#### $\text{Nb}_2\text{AC}$ (A= Ga, Ge, Tl, Zn, P, In, Cd)

Prima Das, N. Jahan\*, M. A. Ali\*

Department of physics, Chittagong University of Engineering and Technology (CUET)

Chattogram-4349, Bangladesh

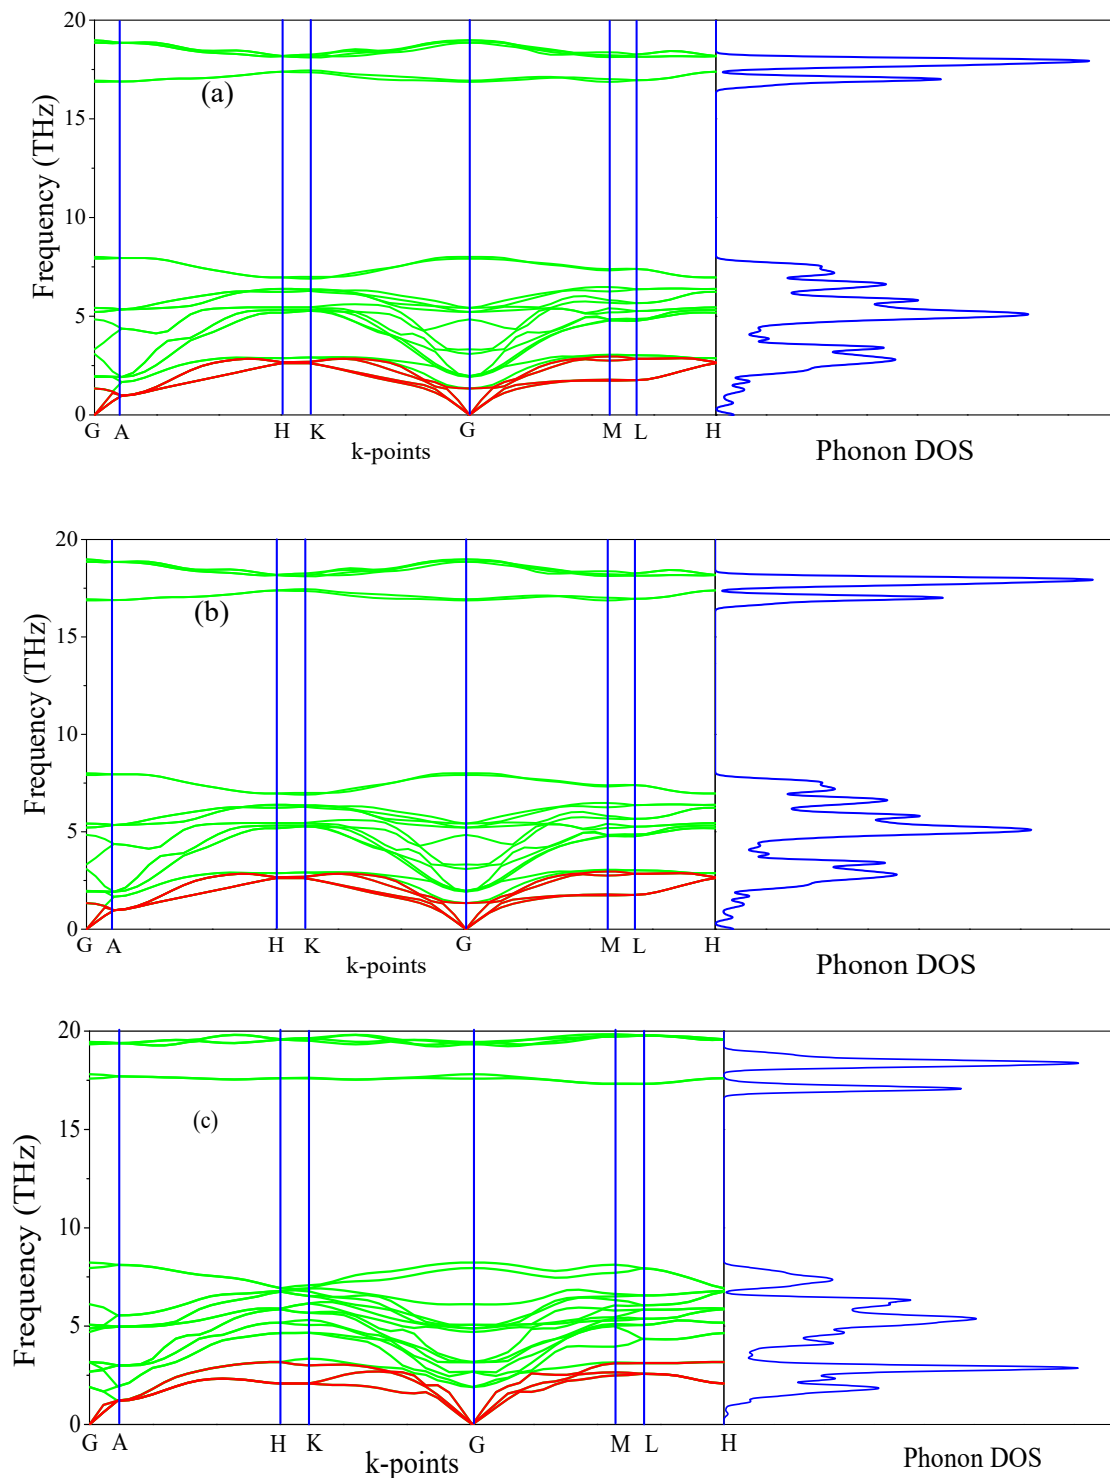

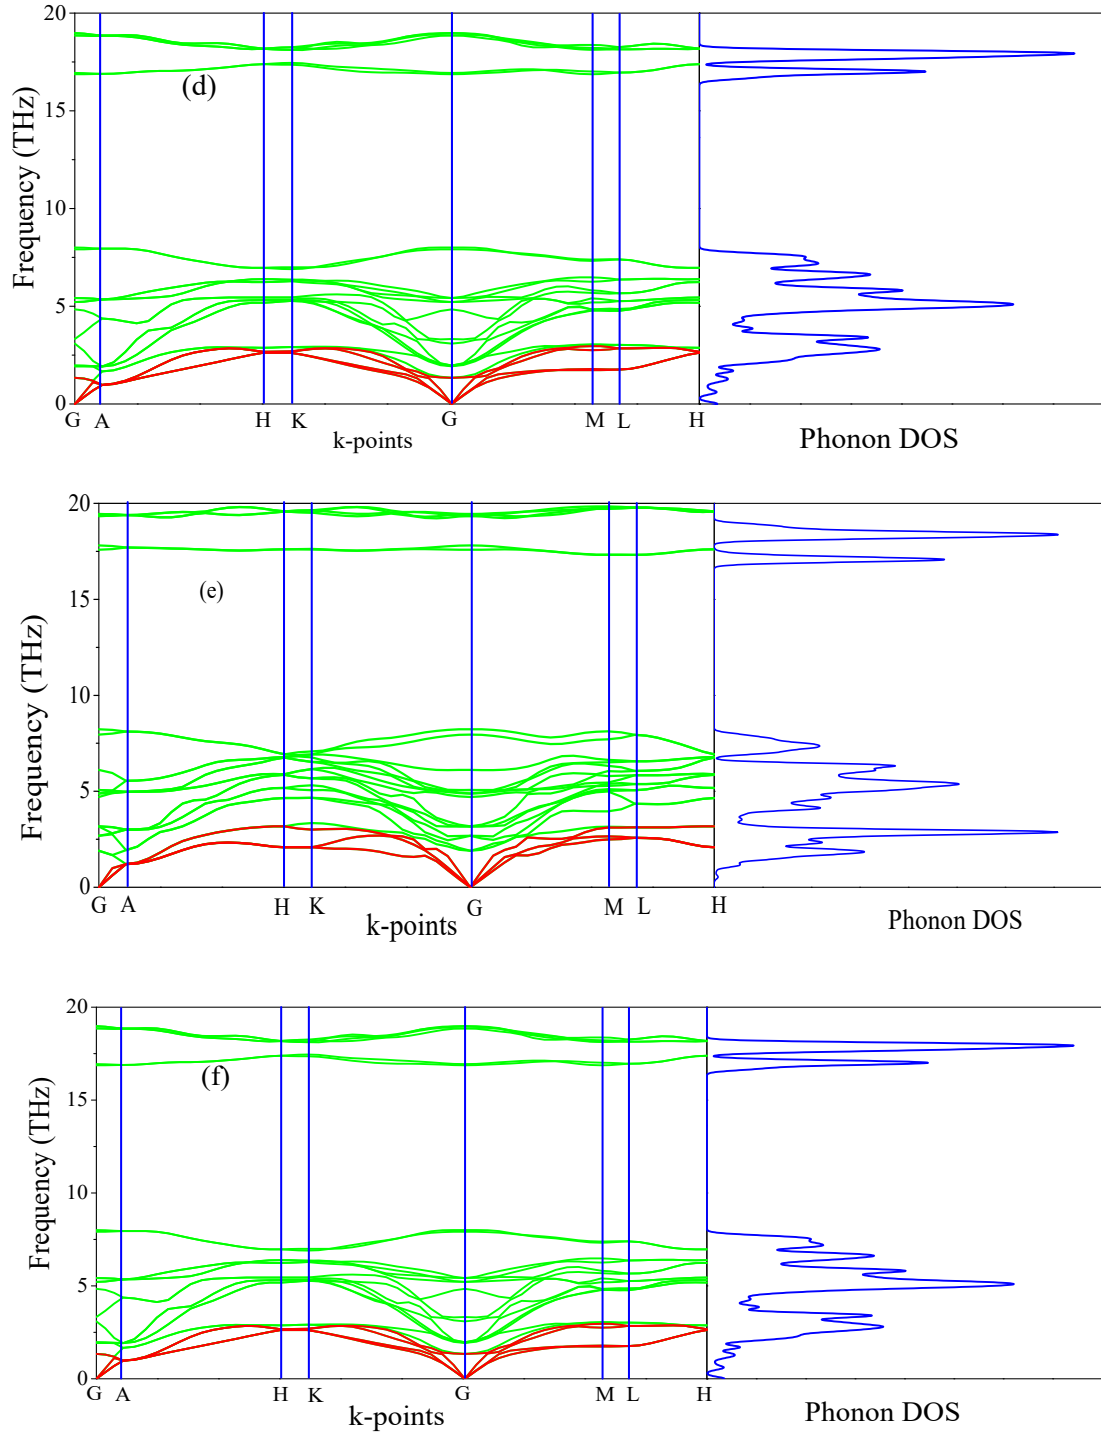

19

**Fig.S-1:** Phonon dispersion curve and phonon DOS of (a) Nb<sub>2</sub>GeC, (b) Nb<sub>2</sub>TlC, (c) Nb<sub>2</sub>ZnC, (d) Nb<sub>2</sub>PC, (e) Nb<sub>2</sub>InC and (f) Nb<sub>2</sub>CdC calculated using GGA PBEsol.

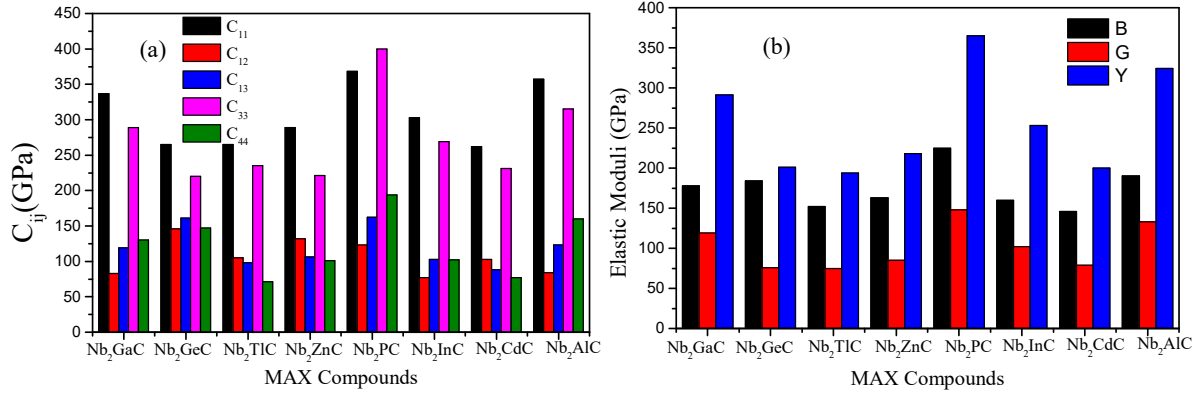

**Fig.S-2:** (a) The stiffness constant and (b) elastic moduli of Nb<sub>2</sub>AC (A = Ga, Ge, Ti, Zn, P, In, Cd, Al) MAX phases calculated using GGA PBE.

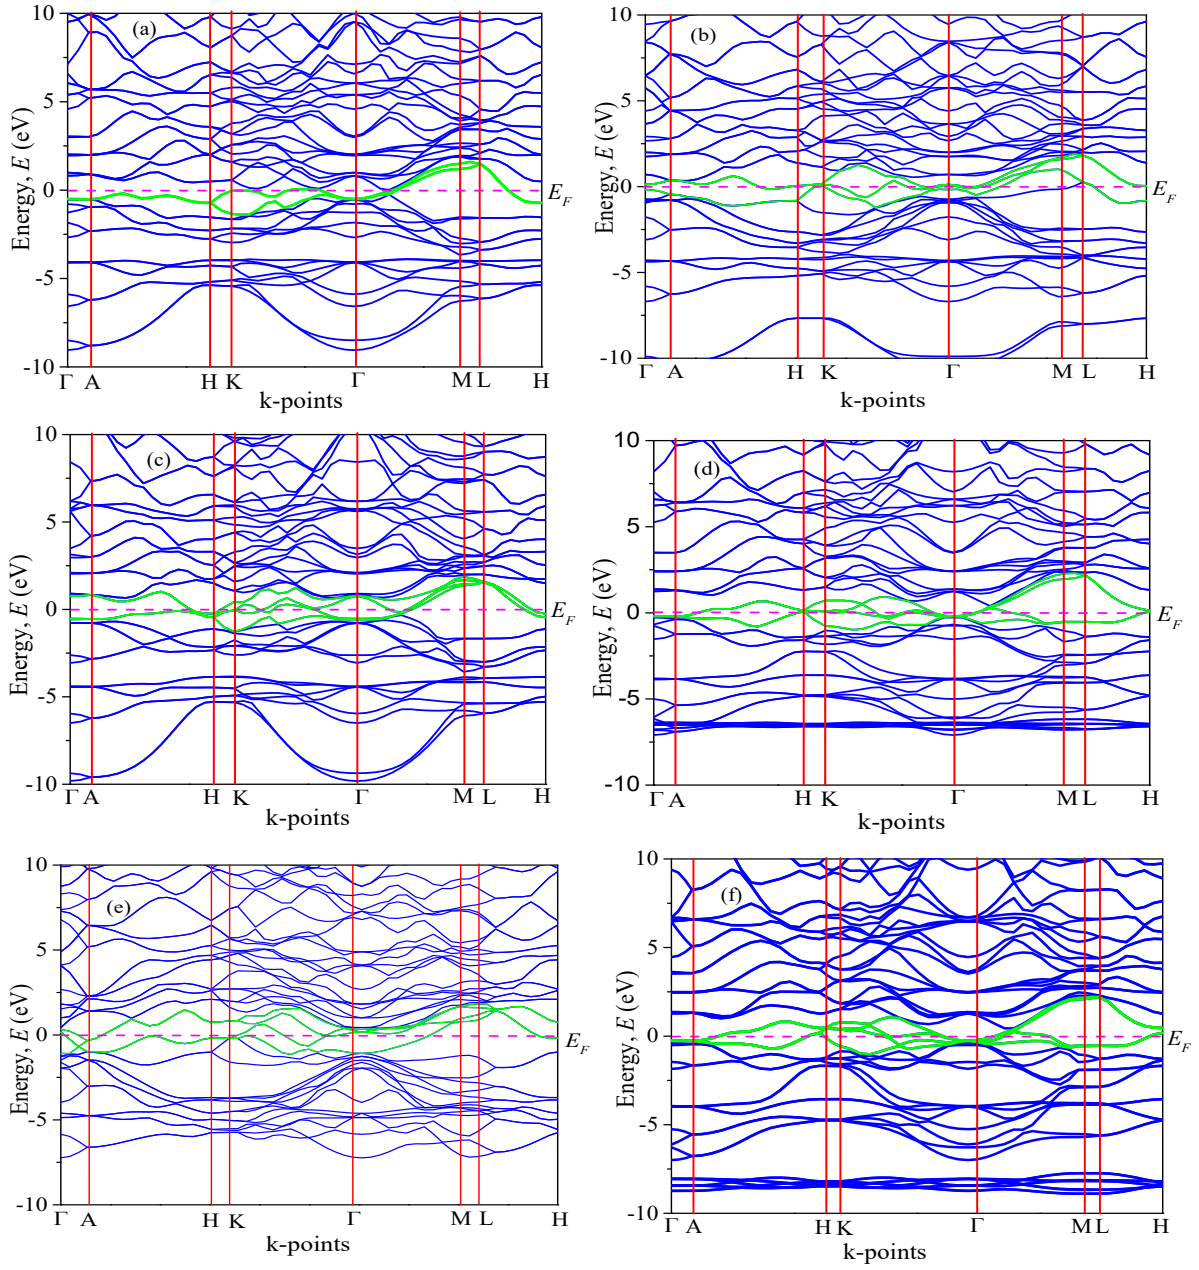

**Fig.S-3:** Band Structure of a)  $\text{Nb}_2\text{GeC}$ , b)  $\text{Nb}_2\text{TlC}$ , c)  $\text{Nb}_2\text{ZnC}$ , d)  $\text{Nb}_2\text{PC}$ , e)  $\text{Nb}_2\text{ZnC}$  and f)  $\text{Nb}_2\text{CdC}$  calculated using GGA PBEsol.

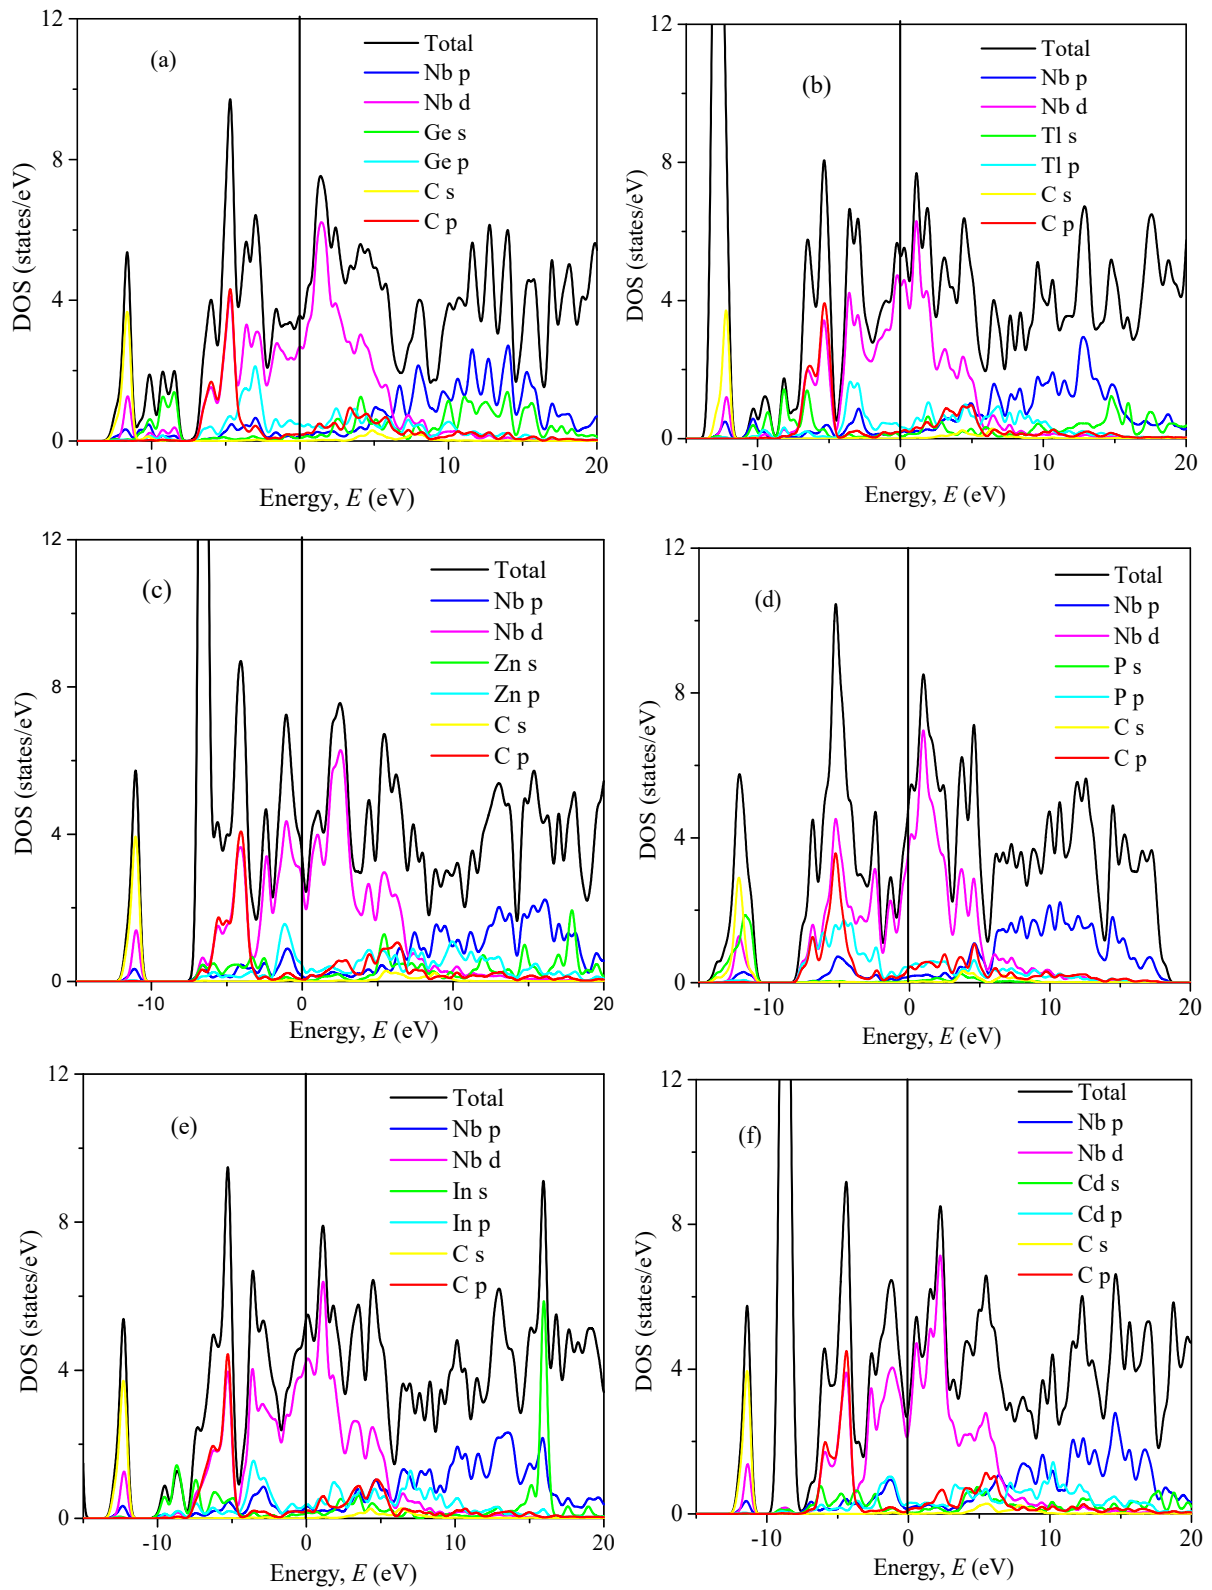

**Fig.S-4:** Total and Partial DOS of a) Nb<sub>2</sub>GeC, b) Nb<sub>2</sub>TiC, c) Nb<sub>2</sub>ZnC, d) Nb<sub>2</sub>PC, e) Nb<sub>2</sub>ZnC and f) Nb<sub>2</sub>CdC calculated using GGA PBEsol.

**(a) Young's modulus**

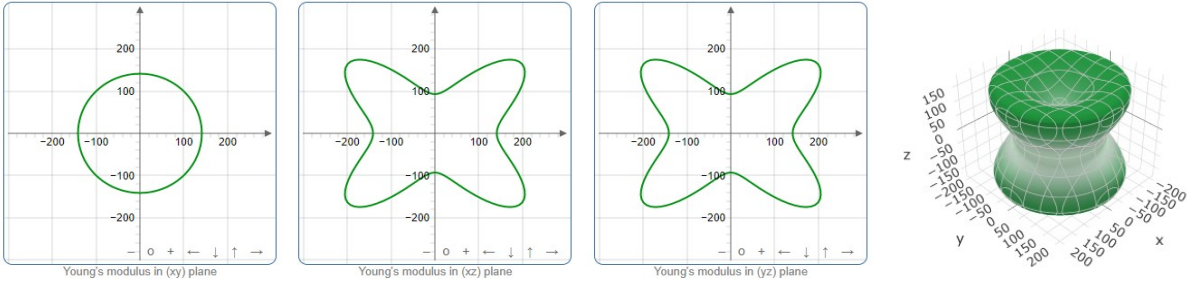

**(b) Compressibility**

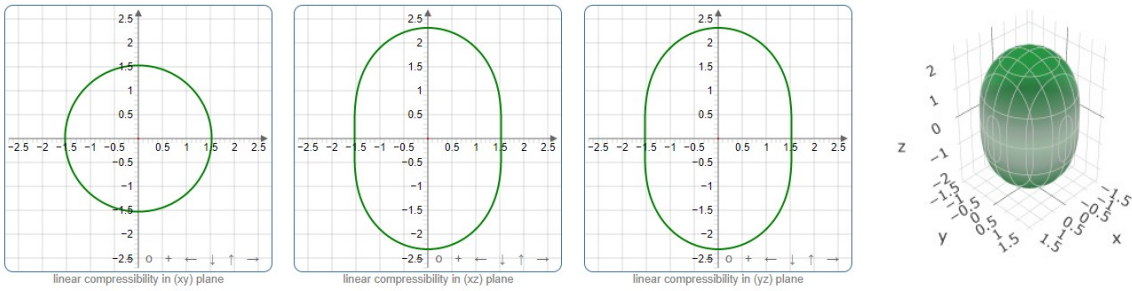

**(c) Shear modulus**

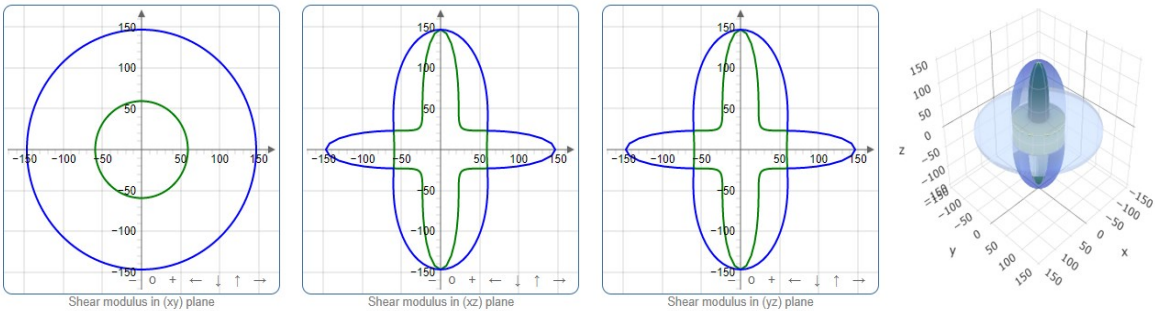

**(d) Poisson's ratio**

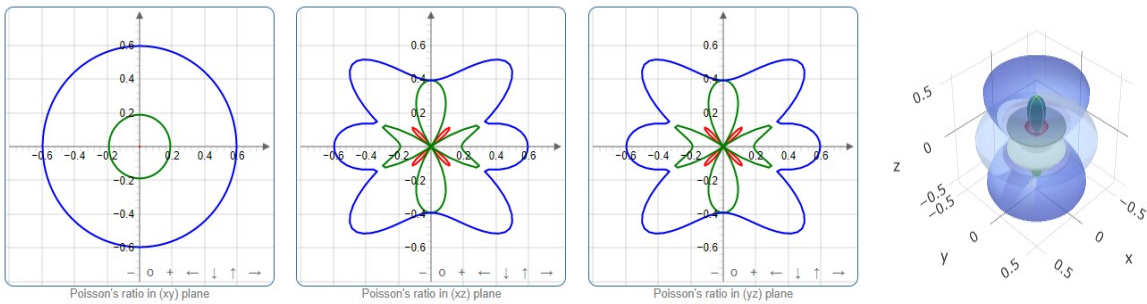

**Fig.S-5:** The 2D and 3D plots of (a)  $Y$ , (b)  $K$ , (c)  $G$  and (d)  $\nu$  of  $\text{Nb}_2\text{GeC}$  calculated using GGA PBEsol.

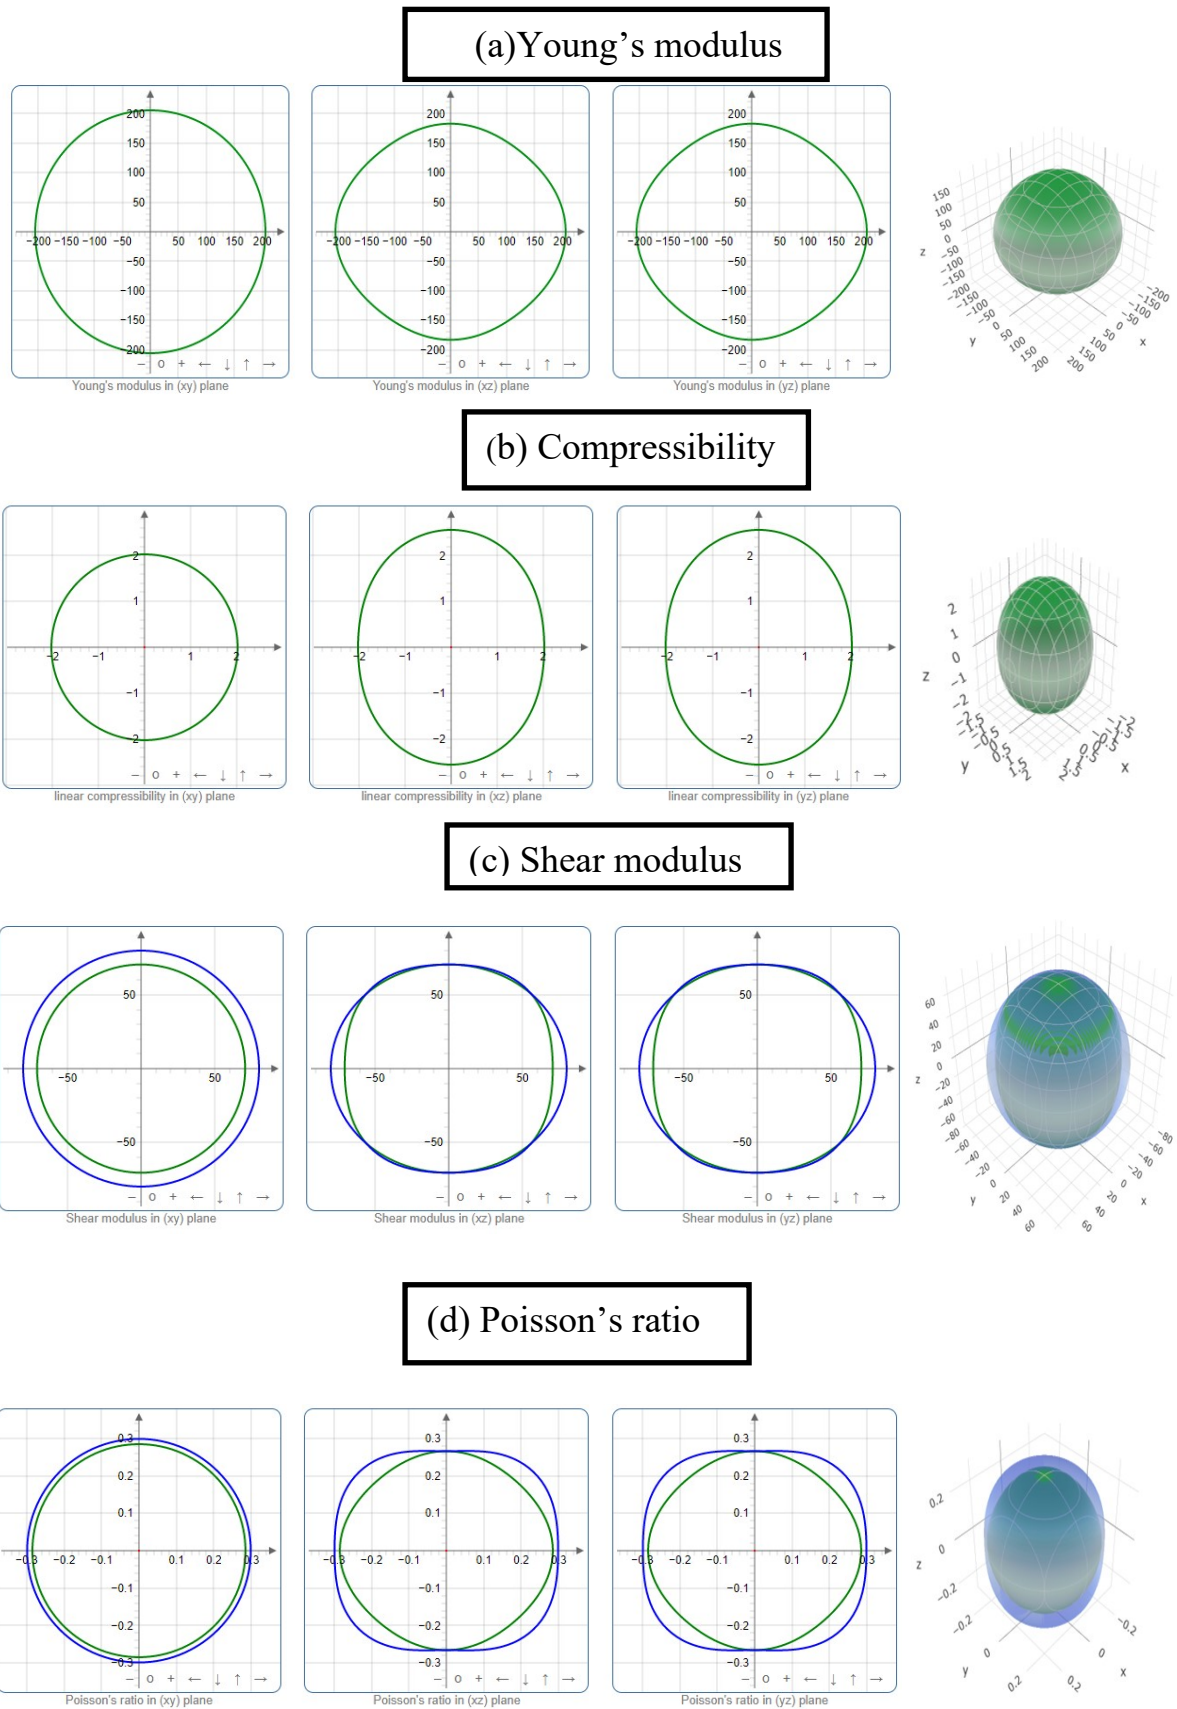

**Fig.S-6:** The 2D and 3D plots of (a)  $Y$ , (b)  $K$ , (c)  $G$  and (d)  $\nu$  of Nb<sub>2</sub>TiC calculated using GGA PBEsol.

(a) Young's modulus

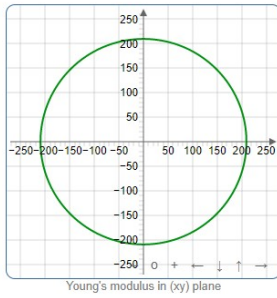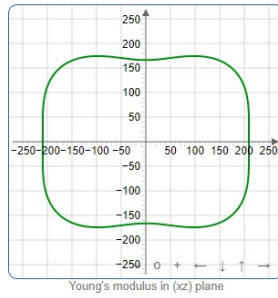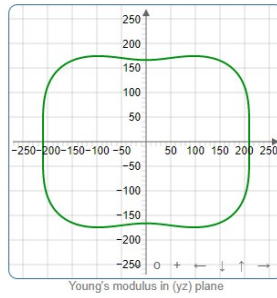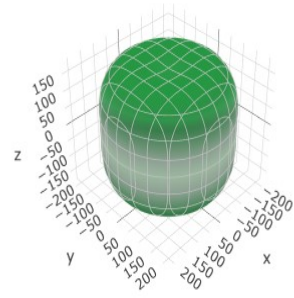

(b) Compressibility

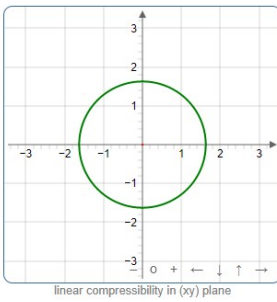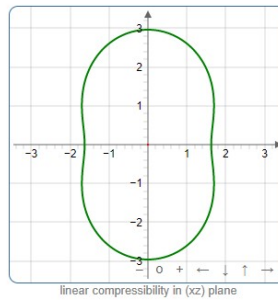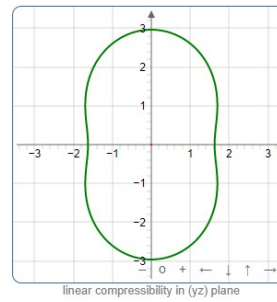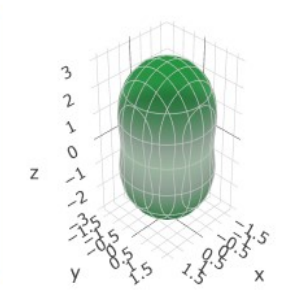

(c) Shear modulus

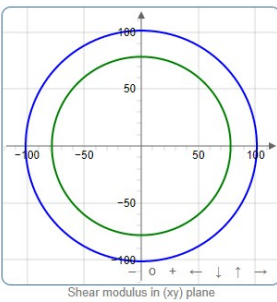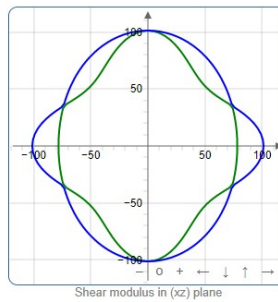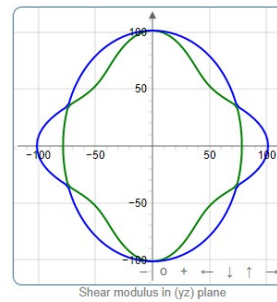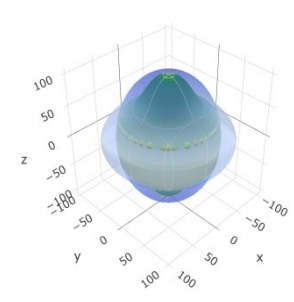

(d) Poisson's ratio

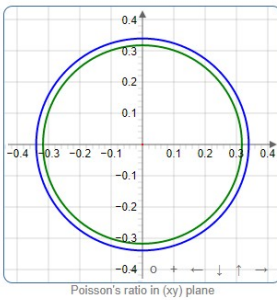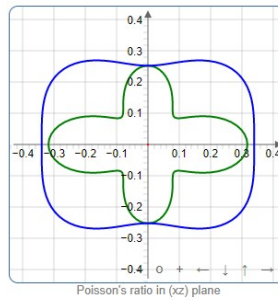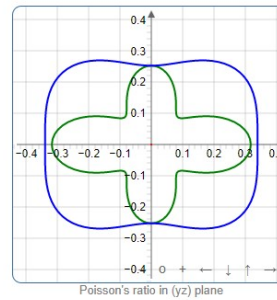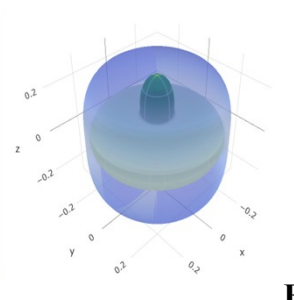

F

ig.S-7: The 2D and 3D plots of (a)  $Y$ , (b)  $K$ , (c)  $G$  and (d)  $\nu$  of  $Nb_2ZnC$  calculated using GGA PBEsol.



### (a) Young's modulus

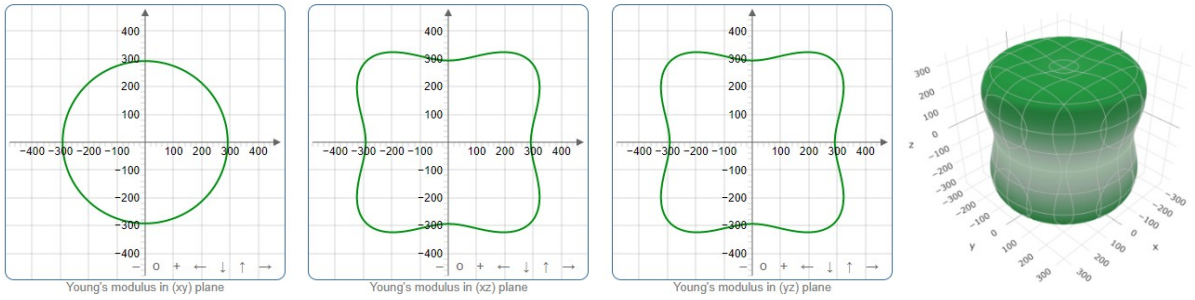

### (b) Compressibility

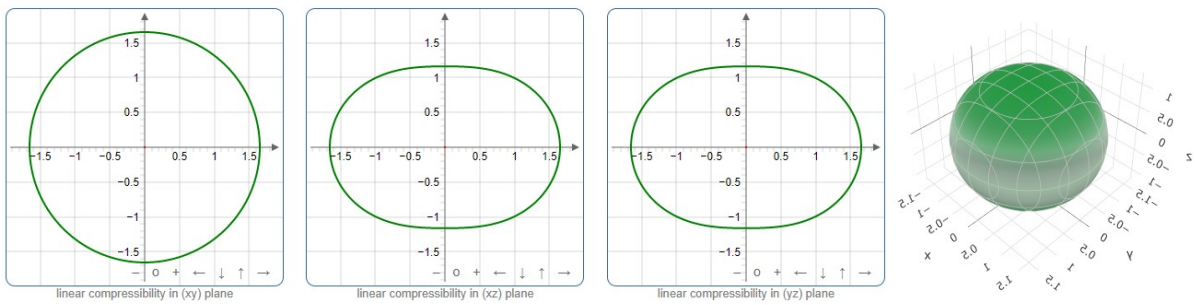

### (c) Shear modulus

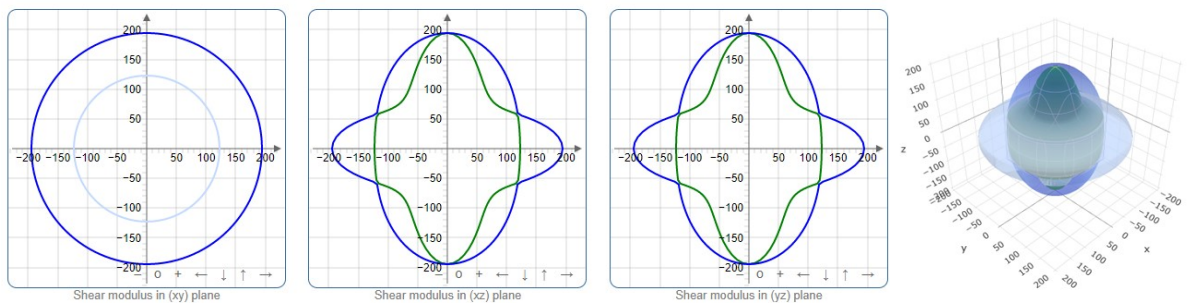

### (d) Poisson's ratio

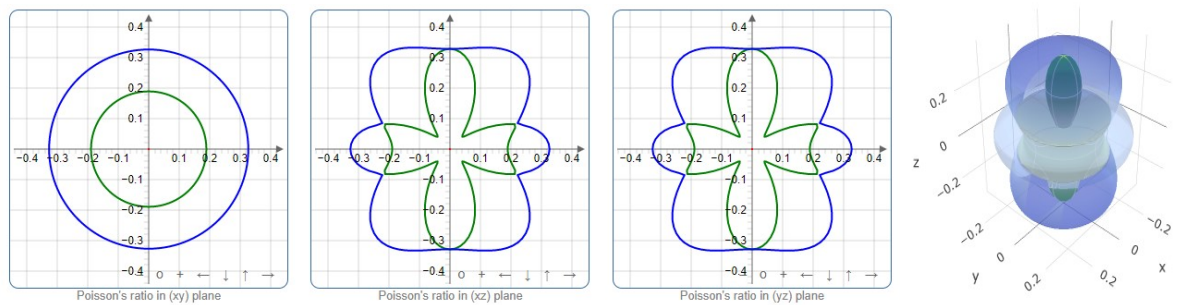

**Fig.S-8:** The 2D and 3D plots of (a)  $Y$ , (b)  $K$ , (c)  $G$  and (d)  $\nu$  of Nb<sub>2</sub>PC calculated using GGA PBEsol.

### (a) Young's modulus

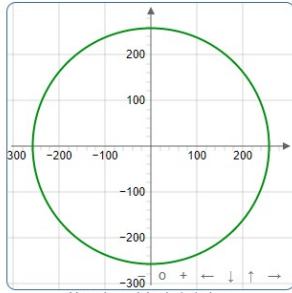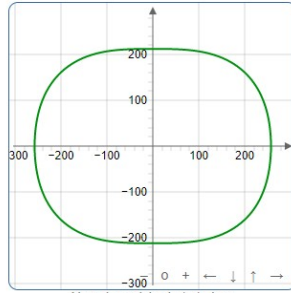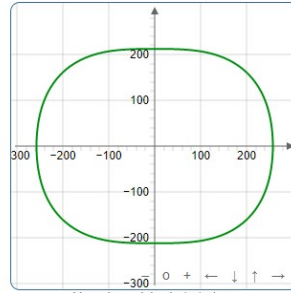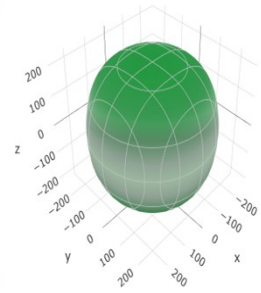

### (b) Compressibility

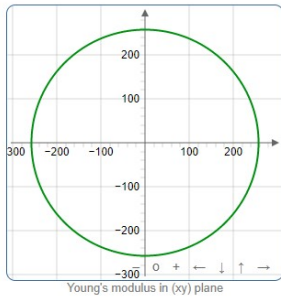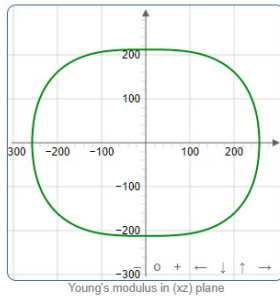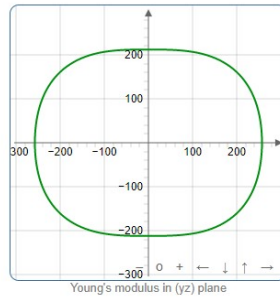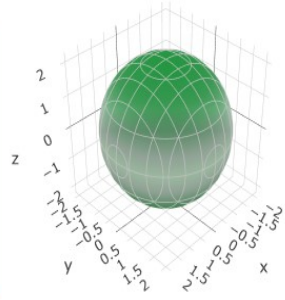

### (c) Shear modulus

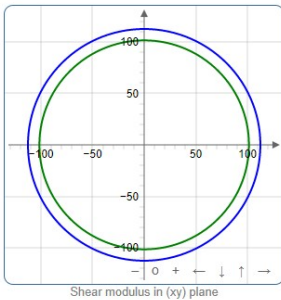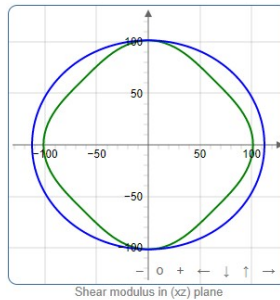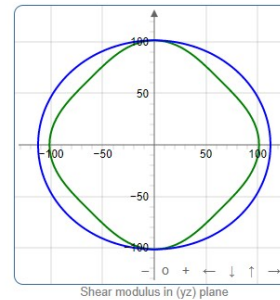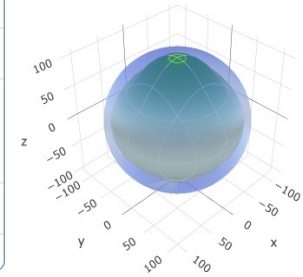

### (d) Poisson's ratio

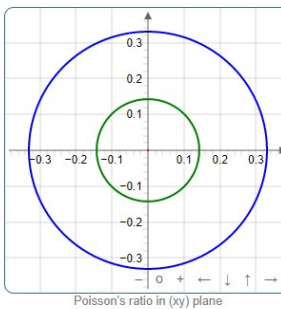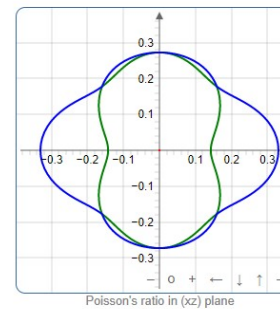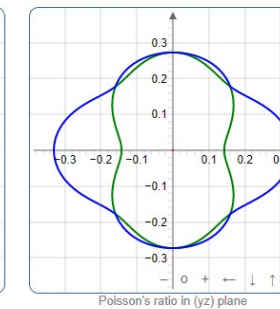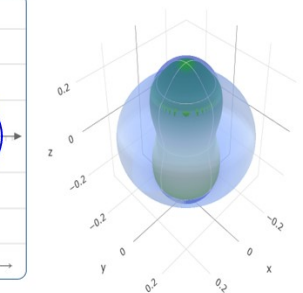

**Fig.S-9:** The 2D and 3D plots of (a) Y, (b) K, (c) G and (d)  $\nu$  of Nb<sub>2</sub>InC calculated using GGA PBEsol.

**(a) Young's modulus**

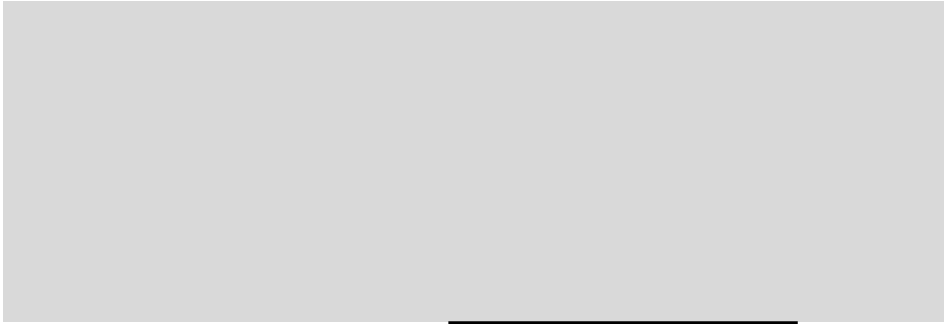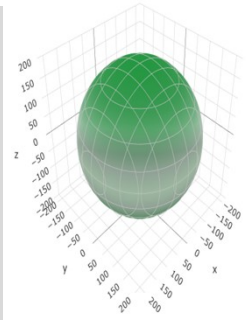

**(b) Compressibility**

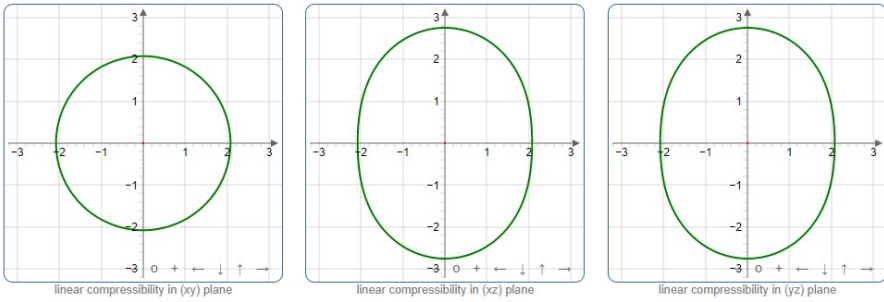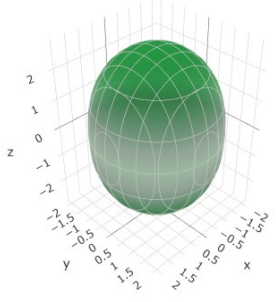

**(c) Shear modulus**

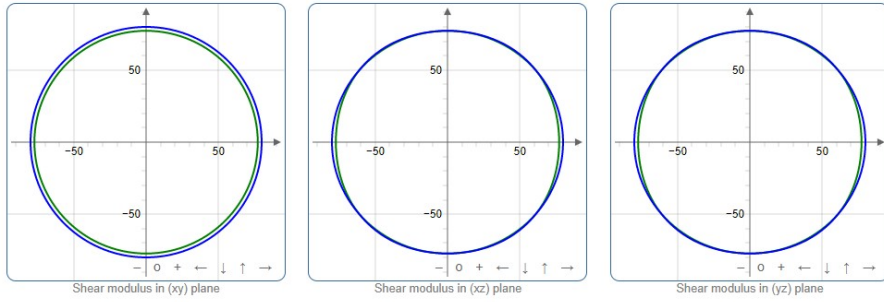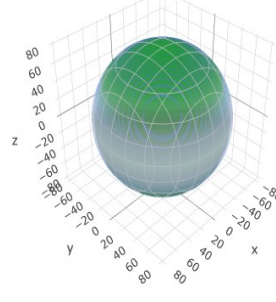

**(d) Poisson's ratio**

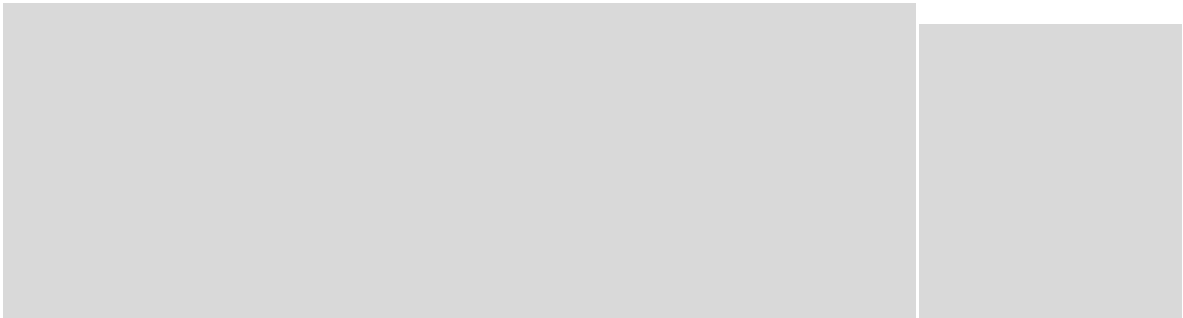

**Fig.S-10:** The 2D and 3D plots of (a) Y, (b) K, (c) G and (d)  $\nu$  of Nb<sub>2</sub>CdC calculated using GGA PBEsol.

**Table S-1:** Mulliken atomic and bond overlap population (BOP) calculated using GGA-PBE.

| Phases              | Atoms | <i>s</i> | <i>p</i> | <i>d</i> | Total | Charge(e) | Bond | Bond number <i>n<sup>u</sup></i> | Bond overlap population <i>P<sup>u</sup></i> | Ref. |
|---------------------|-------|----------|----------|----------|-------|-----------|------|----------------------------------|----------------------------------------------|------|
| Nb <sub>2</sub> GaC | C     | 1.44     | 3.23     | 0.00     | 4.67  | -0.67     | C-Nb | 4                                | 0.93                                         | This |
|                     | Ga    | 0.87     | 1.84     | 9.99     | 12.70 | 0.30      |      |                                  |                                              |      |
|                     | Nb    | 2.27     | 6.63     | 3.92     | 12.82 | 0.18      |      |                                  |                                              |      |
| Nb <sub>2</sub> GeC | C     | 1.44     | 3.22     | 0.00     | 4.66  | -0.66     | C-Nb | 4                                | 0.99                                         | This |
|                     | Ge    | 1.01     | 2.54     | 10.00    | 13.55 | 0.45      |      |                                  |                                              |      |
|                     | Nb    | 2.33     | 6.61     | 3.96     | 12.89 | 0.11      |      |                                  |                                              |      |
| Nb <sub>2</sub> TlC | C     | 1.45     | 3.24     | 0.00     | 4.69  | -0.69     | C-Nb | 4                                | 0.94                                         | This |
|                     | Tl    | 1.04     | 1.79     | 10.02    | 12.85 | 0.15      |      |                                  |                                              |      |
|                     | Nb    | 2.25     | 6.55     | 3.93     | 12.73 | 0.27      |      |                                  |                                              |      |
| Nb <sub>2</sub> ZnC | C     | 1.44     | 3.23     | 0.00     | 4.67  | -0.67     | C-Nb | 4                                | 0.92                                         | This |
|                     | Zn    | 0.53     | 1.32     | 9.93     | 11.78 | 0.22      |      |                                  |                                              |      |
|                     | Nb    | 2.28     | 6.64     | 3.85     | 12.77 | 0.23      |      |                                  |                                              |      |
| Nb <sub>2</sub> PC  | C     | 1.45     | 3.21     | 0.00     | 4.66  | -0.66     | C-Nb | 4                                | 1.01                                         | This |
|                     | P     | 1.58     | 3.48     | 0.00     | 5.06  | -0.06     | P-Nb | 4                                | 0.98                                         |      |
|                     | Nb    | 2.24     | 6.45     | 3.95     | 12.64 | 0.36      |      |                                  |                                              |      |
| Nb <sub>2</sub> InC | C     | 1.44     | 3.22     | 0.00     | 4.66  | -0.66     | C-Nb | 4                                | 0.96                                         | This |
|                     | In    | 0.98     | 1.81     | 9.97     | 12.77 | 0.23      |      |                                  |                                              |      |
|                     | Nb    | 2.23     | 6.64     | 3.92     | 12.79 | 0.21      |      |                                  |                                              |      |
| Nb <sub>2</sub> CdC | C     | 1.45     | 3.24     | 0.00     | 4.70  | -0.70     | C-Nb | 4                                | 0.99                                         | This |
|                     | Cd    | 0.56     | 1.27     | 9.92     | 11.75 | 0.25      |      |                                  |                                              |      |
|                     | Nb    | 2.28     | 6.63     | 3.87     | 12.78 | 0.22      |      |                                  |                                              |      |
| Nb <sub>2</sub> AlC | C     | 1.43     | 3.21     | 0.00     | 4.65  | -0.65     | C-Nb | 4                                | 0.98                                         | This |
|                     | Al    | 0.96     | 1.81     | 0.00     | 2.77  | 0.23      |      |                                  |                                              |      |
|                     | Nb    | 2.20     | 6.62     | 3.97     | 12.79 | 0.21      |      |                                  |                                              |      |

**Table S-2:** Anisotropy factors  $A_1, A_2, A_3, k_c/k_a, B_a, B_c$  percentage anisotropy factors  $A_G$  and  $A_B$  and universal anisotropic index  $A^u$  calculated using GGA-PBE.

| Phase               | $A_1$  | $A_2$  | $A_3$  | $B_a$  | $B_c$   | $K_c/k_a$ | $A_B$ | $A_G$ | $A^u$ | Ref. |
|---------------------|--------|--------|--------|--------|---------|-----------|-------|-------|-------|------|
| Nb <sub>2</sub> GaC | 0.669  | 1.0236 | 0.685  | 453.71 | 1017.29 | 1.07      | 0.003 | 0.013 | 0.134 | This |
| Nb <sub>2</sub> GeC | 0.2347 | 2.4706 | 0.5798 | 440.74 | 1886.74 | 1.51      | 0.003 | 0.016 | 1.846 | This |
| Nb <sub>2</sub> TlC | 1.0516 | 0.8875 | 0.9333 | 513.49 | 982.77  | 1.27      | 0.002 | 0.002 | 0.024 | This |
| Nb <sub>2</sub> ZnC | 0.7244 | 1.2866 | 0.9321 | 455.93 | 713.39  | 1.82      | 0.014 | 0.013 | 0.160 | This |
| Nb <sub>2</sub> PC  | 0.552  | 1.584  | 0.874  | 526.67 | 1773.29 | 0.70      | 0.002 | 0.032 | 0.328 | This |
| Nb <sub>2</sub> InC | 0.827  | 0.903  | 0.747  | 440.46 | 941.15  | 1.05      | 0.003 | 0.005 | 0.050 | This |
| Nb <sub>2</sub> CdC | 1.123  | 0.969  | 0.648  | 523.91 | 884.98  | 1.32      | 0.005 | 0.001 | 0.019 | This |
| Nb <sub>2</sub> AlC | 0.618  | 1.236  | 0.764  | 491.08 | 1029.15 | 1.09      | 0.003 | 0.016 | 0.165 | This |

**Table S-3:** Calculated density ( $\rho$ ), longitudinal, transverse and average sound velocities ( $v_l$ ,  $v_t$ , and  $v_m$ , respectively), Debye temperature ( $\Theta_D$ ), minimum thermal conductivity ( $K_{min}$ ) and Grüneisen parameter ( $\gamma$ ) of  $Nb_2AC$  ( $A = Ga, Ge, Tl, Zn, P, In, Cd, Al$ ) calculated using GGA-PBE..

| Phases              | $\rho$<br>(g/cm <sup>3</sup> ) | $v_l$<br>(m/s) | $v_t$<br>(m/s) | $v_m$<br>(m/s) | $\Theta_D$<br>(K) | $K_{min}$<br>(W/mk) | $\gamma$ | $T_m$<br>(K) | Ref. |
|---------------------|--------------------------------|----------------|----------------|----------------|-------------------|---------------------|----------|--------------|------|
| Nb <sub>2</sub> GaC | 7.59                           | 6660           | 3959           | 4031           | 533               | 0.91                | 1.41     | 1799         | This |
| Nb <sub>2</sub> GeC | 7.76                           | 6064           | 3129           | 3239           | 428               | 0.75                | 2.06     | 1479         | This |
| Nb <sub>2</sub> TlC | 10.18                          | 4975           | 2714           | 2794           | 354               | 0.59                | 1.71     | 1502         | This |
| Nb <sub>2</sub> ZnC | 7.43                           | 6098           | 3382           | 3480           | 457               | 0.79                | 1.66     | 1553         | This |
| Nb <sub>2</sub> PC  | 8.28                           | 7140           | 4227           | 4682           | 736               | 1.81                | 1.41     | 2058         | This |
| Nb <sub>2</sub> InC | 11.49                          | 5074           | 2978           | 3301           | 492               | 1.15                | 1.45     | 1667         | This |
| Nb <sub>2</sub> CdC | 8.06                           | 5584           | 3130           | 3484           | 411               | 0.76                | 1.60     | 1487         | This |
| Nb <sub>2</sub> AlC | 6.34                           | 7520           | 4474           | 4953           | 612               | 0.83                | 1.37     | 1897         | This |
